# Supplementary material for: VEGF Is Involved in the Increase of Dermal Microvascular Permeability Induced by Tryptase
Source: PubMed Central journal article supplement (PMC3361195; doi:10.5402/2012/941465), 2012-05-15
Supplement: 941465.f1.pdf [file 941465.f1.pdf]

## Supplemental Information

### Supplemental Fig.1

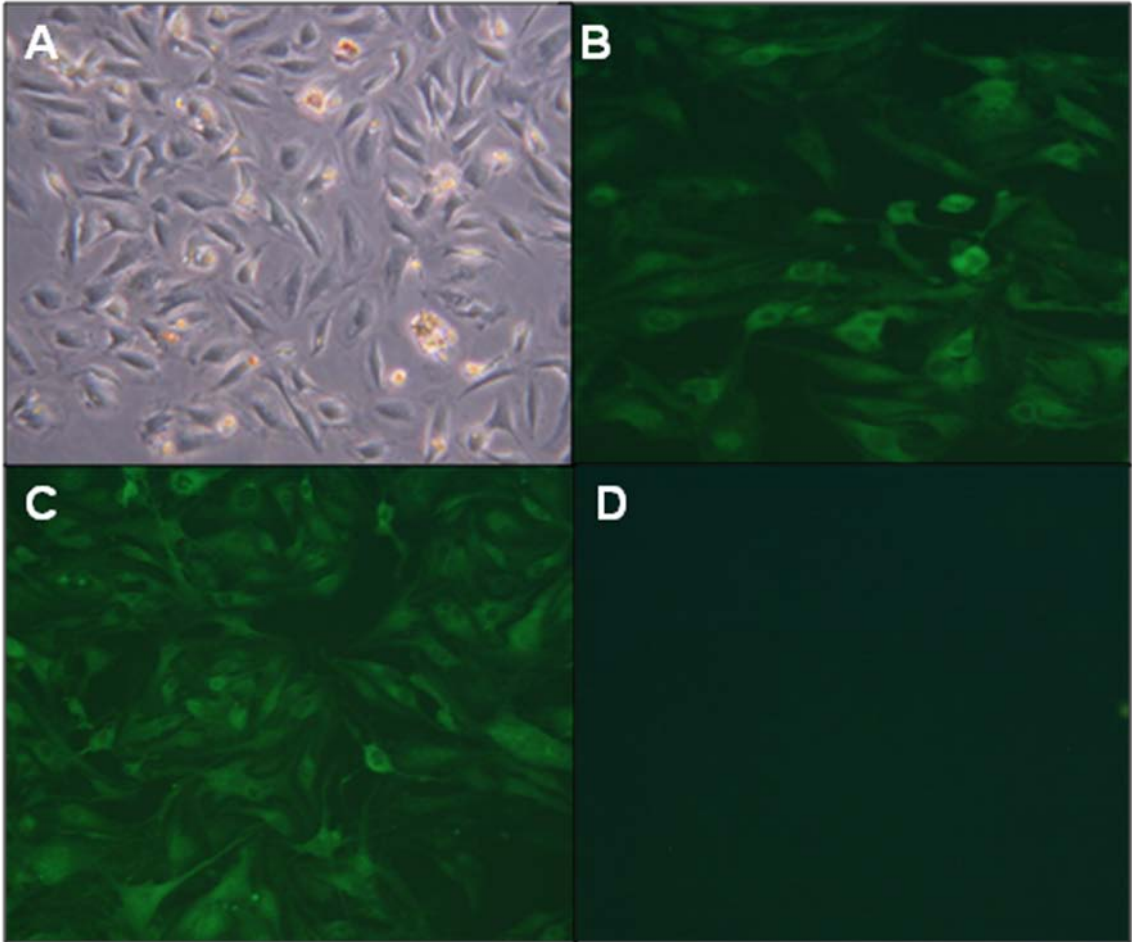

**Supplemental Fig.1** Determination of purity of primary HDMECs by immunofluorescence. Morphology of passage 2 human dermal microvascular endothelial cells (HDMECs) was shown in (A). To confirm the purity of HDMECs, we used von Willebrand's factor (B) and CD34 (C) immunofluorescent staining, which are specific for endothelial cells. Negative control without first antibody staining was shown in (D). (X 200)

## Supplemental Fig.2

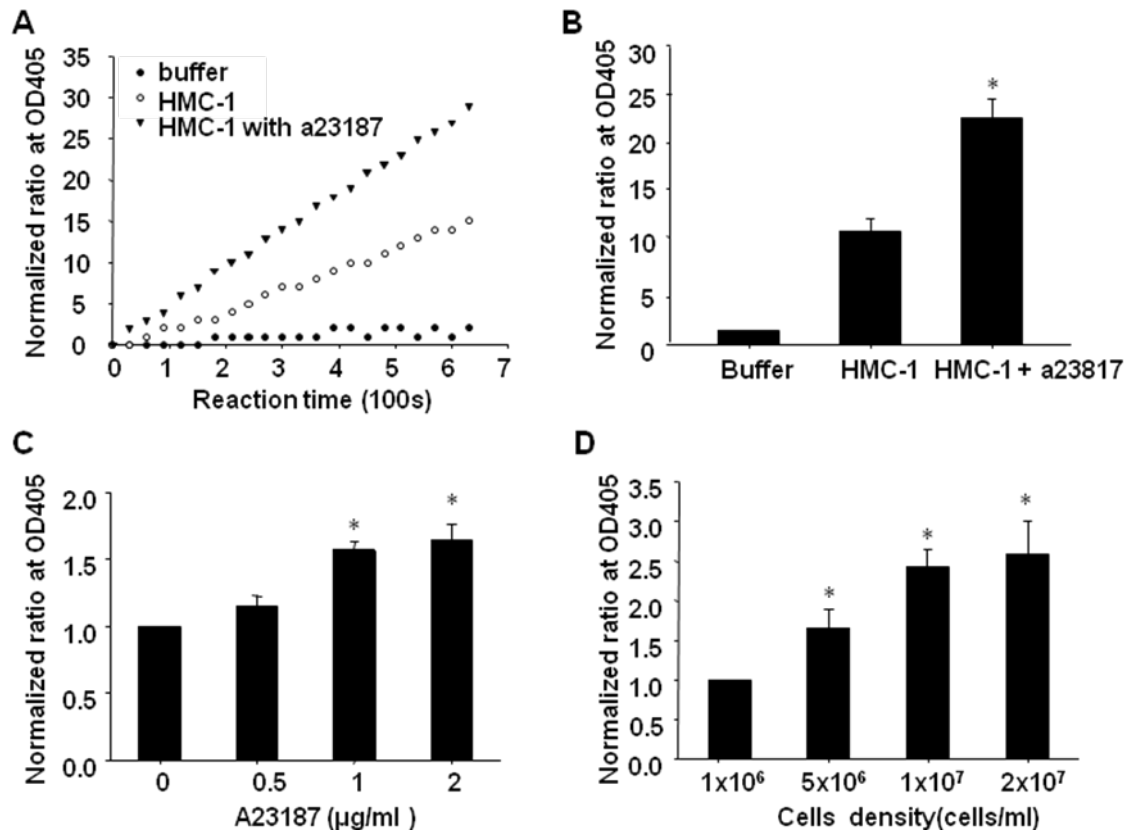

**Supplemental Fig.2** Determination of the tryptase activity in HMC-1 supernatant. **A:** HMC-1 supernatant was incubated with substrate (t6140) in the presence or absence of a23187 for 10 minutes. OD value of the reactions was measured by spectrophotometer at 405nm each 30 seconds. The control is set with only the reaction buffer. **B:** Comparison of the tryptase activity of HMC-1 supernatant without and with pro-degranulating agent a23187. **C:** Tryptase activities of the HMC-1 supernatant stimulated by different concentrations of a23187. **D:** Tryptase activities of the HMC-1 supernatant with different cell densities, which were normalized to the group of 10<sup>6</sup> HMC-1 cells/ml. \*P < 0.05 compared to control.
